# Supplementary material for: Maternal occupational exposure to endocrine-disrupting chemicals and urogenital anomalies in the offspring
Source: PubMed Central journal article supplement — Hum Reprod. 2021 Nov 6;37(1):142–51. doi: 10.1093/humrep/deab205 (PMC8730314; doi:10.1093/humrep/deab205), 2021-11-06
Supplement: deab205_supplementary_table_s1.pdf [file deab205_supplementary_table_s1.pdf]

**Supplementary Table SI** Baseline characteristics of Lifelines controls and Eurocat cases, Northern Netherlands, 1997–2013.

| Occupational exposure                     | Controls |        | Urinary anomalies |        | Hypospadias      |        |
|-------------------------------------------|----------|--------|-------------------|--------|------------------|--------|
|                                           | n        | (%)    | n                 | (%)    | n                | (%)    |
| N (total)                                 | 5602     |        | 537 <sup>g</sup>  |        | 371 <sup>g</sup> |        |
| Child biological sex <sup>e</sup>         |          |        |                   |        |                  |        |
| Boy                                       | 2731     | (48.8) | 377               | (70.2) | 371              | (100)  |
| Girl                                      | 2871     | (51.2) | 160               | (29.8) | 0                | (0)    |
| Birth year <sup>e,f</sup>                 |          |        |                   |        |                  |        |
| 1997–2000                                 | 1240     | (22.1) | 103               | (19.2) | 76               | (20.4) |
| 2001–2004                                 | 1660     | (29.6) | 108               | (20.1) | 85               | (22.8) |
| 2005–2008                                 | 1293     | (23.1) | 131               | (24.4) | 114              | (30.6) |
| 2009–2013                                 | 1409     | (25.2) | 195               | (36.3) | 96               | (25.7) |
| Maternal age at delivery <sup>e,f</sup>   |          |        |                   |        |                  |        |
| 15–19 years <sup>a</sup>                  | 3        | (0.1)  | 1                 | (0.2)  | 1                | (0.3)  |
| 20–24                                     | 191      | (3.6)  | 40                | (7.5)  | 28               | (7.5)  |
| 25–29                                     | 1492     | (28.2) | 167               | (31.5) | 128              | (34.5) |
| 30–34                                     | 2470     | (46.7) | 225               | (42.4) | 155              | (41.8) |
| 35–39                                     | 1058     | (20.0) | 90                | (16.9) | 57               | (15.4) |
| >40                                       | 73       | (1.4)  | 8                 | (1.5)  | 2                | (0.5)  |
| Unknown                                   | 315      |        | 6                 |        | 0                |        |
| BMI (kg/m <sup>2</sup> ) <sup>b,e,f</sup> |          |        |                   |        |                  |        |
| Underweight (<18.5)                       | 56       | (1.0)  | 10                | (1.9)  | 4                | (1.1)  |
| Normal (18.5–25)                          | 2871     | (53.6) | 340               | (65.6) | 245              | (66.8) |
| Overweight (25–30)                        | 1610     | (30.1) | 112               | (21.6) | 82               | (22.3) |
| Obese (>30)                               | 818      | (15.3) | 56                | (10.8) | 36               | (9.8)  |
| Unknown                                   | 247      |        | 19                |        | 4                |        |
| Education level                           |          |        |                   |        |                  |        |
| Low                                       | 649      | (12.3) | 56                | (10.7) | 38               | (10.3) |
| Middle                                    | 2396     | (45.4) | 260               | (49.7) | 185              | (50.3) |
| High                                      | 2236     | (42.3) | 207               | (39.6) | 145              | (39.4) |
| Unknown                                   | 321      |        | 14                |        | 3                |        |
| Smoking during pregnancy <sup>c,e,f</sup> |          |        |                   |        |                  |        |
| No                                        | 5036     | (90.2) | 415               | (78.3) | 300              | (81.1) |
| Yes                                       | 549      | (9.8)  | 115               | (21.7) | 70               | (18.9) |
| Unknown                                   | 17       |        | 7                 |        | 1                |        |
| Alcohol during pregnancy <sup>c,e,f</sup> |          |        |                   |        |                  |        |
| No                                        | 5045     | (90.3) | 406               | (76.7) | 281              | (76.2) |
| Yes                                       | 544      | (9.7)  | 123               | (23.3) | 88               | (23.8) |
| Unknown                                   | 13       |        | 8                 |        | 2                |        |
| Folic acid use <sup>e</sup>               |          |        |                   |        |                  |        |
| No                                        | 847      | (16.5) | 139               | (26.3) | 71               | (19.2) |
| Yes                                       | 4272     | (83.5) | 389               | (73.7) | 299              | (80.8) |
| Unknown                                   | 483      |        | 9                 |        | 1                |        |

(continued)

### Supplementary Table SI Continued

| Occupational exposure           | Controls |        | Urinary anomalies |        | Hypospadias |        |
|---------------------------------|----------|--------|-------------------|--------|-------------|--------|
|                                 | n        | (%)    | n                 | (%)    | n           | (%)    |
| Fertility problems <sup>e</sup> |          |        |                   |        |             |        |
| No                              | 5230     | (93.9) | 481               | (90.9) | 352         | (95.1) |
| Yes                             | 339      | (6.1)  | 48                | (9.1)  | 18          | (4.9)  |
| Unknown                         | 33       |        | 8                 |        | 1           |        |

<sup>a</sup>Lifelines includes participants from 18 years old.

<sup>b</sup>BMI of Eurocat cases is based on self-reported weight and length at early pregnancy, whereas weight and length of Lifelines participants are measured at baseline visit at the study clinic.

<sup>c</sup>Eurocat reported smoking/alcohol use during pregnancy, whereas Lifelines reported this specifically for the first trimester.

<sup>d</sup>Only boys were selected as controls for hypospadias.

<sup>e</sup>Significant difference between urinary cases and controls ( $P$ -value  $<0.05$ ) using  $\chi^2$  tests.

<sup>f</sup>Significant difference between hypospadias cases and controls ( $P$ -value  $<0.05$ ) using  $\chi^2$  tests.

<sup>g</sup>Seven cases with both urinary tract anomalies and hypospadias were counted in both groups.

EUROCAT, European Concerted Action on Congenital Anomalies and Twins.
