# Supplementary material for: Maternal occupational exposure to endocrine-disrupting chemicals and urogenital anomalies in the offspring
Source: PubMed Central journal article supplement — Hum Reprod. 2021 Nov 6;37(1):142–51. doi: 10.1093/humrep/deab205 (PMC8730314; doi:10.1093/humrep/deab205), 2021-11-06
Supplement: deab205_supplementary_table_s2.pdf [file deab205_supplementary_table_s2.pdf]

**Supplementary Table SII Prevalence, crude OR, and adjusted OR of maternal occupational exposure to EDCs and the risk of isolated urinary anomalies in the offspring (Eurocat) compared to non-malformed controls (Lifelines), Northern Netherlands, 1997–2013.**

| Occupational exposure                                          | Total | Unexposed |        | Exposed <sup>a</sup> |        | Unadjusted |             | Adjusted <sup>b</sup> |             |  |
|----------------------------------------------------------------|-------|-----------|--------|----------------------|--------|------------|-------------|-----------------------|-------------|--|
|                                                                | n     | n         | (%)    | n                    | (%)    | OR         | 95% CI      | OR                    | 95% CI      |  |
| <b>Any EDC</b>                                                 |       |           |        |                      |        |            |             |                       |             |  |
| Controls                                                       | 5602  | 4491      | (80.2) | 1111                 | (19.8) | 1.00       |             | 1.00                  |             |  |
| Urinary anomalies                                              | 420   | 326       | (77.6) | 94                   | (22.4) | 1.17       | (0.92–1.48) | 1.16                  | (0.90–1.50) |  |
| Malformations of the renal parenchyma                          | 64    | 63        | (82.8) | 11                   | (17.2) | 0.84       | (0.44–1.61) | 0.78                  | (0.40–1.54) |  |
| Anomalies of the urinary collecting system                     | 315   | 237       | (75.2) | 78                   | (24.8) | 1.33       | (1.02–1.73) | 1.32                  | (0.99–1.76) |  |
| Abnormal embryonic migration of kidneys                        | 12    | <5        |        |                      |        | NC         |             | NC                    |             |  |
| Combination of urinary tract anomalies                         | 29    | <5        |        |                      |        | NC         |             | NC                    |             |  |
| <b>PAHs</b>                                                    |       |           |        |                      |        |            |             |                       |             |  |
| Controls                                                       | 5602  | 5251      | (93.7) | 351                  | (6.3)  | 1.00       |             | 1.00                  |             |  |
| Urinary total                                                  | 420   | 390       | (92.9) | 30                   | (7.1)  | 1.15       | (0.78–1.69) | 1.06                  | (0.70–1.61) |  |
| Malformations of the renal parenchyma                          | 64    | <5        |        |                      |        | NC         |             | NC                    |             |  |
| Anomalies of the urinary collecting system                     | 315   | 287       | (91.1) | 28                   | (8.9)  | 1.46       | (0.98–2.18) | 1.35                  | (0.88–2.07) |  |
| Abnormal embryonic migration of kidneys                        | 12    | <5        |        |                      |        | NC         |             | NC                    |             |  |
| Combination of urinary tract anomalies                         | 30    | <5        |        |                      |        | NC         |             | NC                    |             |  |
| <b>Pesticides</b>                                              |       |           |        |                      |        |            |             |                       |             |  |
| Controls                                                       | 5602  | 5486      | (97.9) | 116                  | (2.1)  | 1.00       |             | 1.00                  |             |  |
| Urinary total                                                  | 420   | 415       | (98.8) | 5                    | (1.2)  | 0.57       | (0.23–1.40) | 0.56                  | (0.22–1.43) |  |
| Malformations of the renal parenchyma                          | 64    | <5        |        |                      |        | NC         |             | NC                    |             |  |
| Anomalies of the urinary collecting system                     | 315   | 310       | (98.4) | 5                    | (1.6)  | 0.76       | (0.31–1.88) | 0.74                  | (0.89–1.91) |  |
| Abnormal embryonic migration of kidneys                        | 12    | <5        |        |                      |        | NC         |             | NC                    |             |  |
| Combination of urinary tract anomalies                         | 29    | <5        |        |                      |        | NC         |             | NC                    |             |  |
| <b>Organic solvents/alkylphenolic compounds<sup>c</sup></b>    |       |           |        |                      |        |            |             |                       |             |  |
| Controls                                                       | 5602  | 5220      | (93.2) | 382                  | (6.8)  | 1.00       |             | 1.00                  |             |  |
| Urinary total                                                  | 420   | 382       | (91.0) | 38                   | (9.0)  | 1.36       | (0.96–1.93) | 1.31                  | (0.90–1.91) |  |
| Malformations of the renal parenchyma                          | 64    | 59        | (92.2) | 5                    | (7.8)  | 1.16       | (0.46–2.90) | 1.09                  | (0.43–2.80) |  |
| Anomalies of the urinary collecting system                     | 315   | 284       | (90.2) | 31                   | (9.8)  | 1.49       | (1.02–2.19) | 1.42                  | (0.94–2.15) |  |
| Abnormal embryonic migration of kidneys                        | 12    | <5        |        |                      |        | NC         |             | NC                    |             |  |
| Combination of urinary tract anomalies                         | 29    | <5        |        |                      |        | NC         |             | NC                    |             |  |
| <b>Phthalates/benzophenones/parabens/siloxanes<sup>c</sup></b> |       |           |        |                      |        |            |             |                       |             |  |
| Controls                                                       | 5602  | 5348      | (95.5) | 254                  | (4.5)  | 1.00       |             | 1.00                  |             |  |
| Urinary total                                                  | 420   | 389       | (92.6) | 31                   | (7.4)  | 1.68       | (1.14–2.47) | 1.63                  | (1.07–2.49) |  |
| Malformations of the renal parenchyma                          | 64    | <5        |        |                      |        | NC         |             | NC                    |             |  |
| Anomalies of the urinary collecting system                     | 315   | 290       | (92.1) | 25                   | (7.9)  | 1.82       | (1.18–2.78) | 1.76                  | (1.11–2.79) |  |
| Abnormal embryonic migration of kidneys                        | 12    | <5        |        |                      |        | NC         |             | NC                    |             |  |
| Combination of urinary tract anomalies                         | 29    | <5        |        |                      |        | NC         |             | NC                    |             |  |

<sup>a</sup>Possible or probable exposure.<sup>b</sup>Adjusted for child sex, birth year, maternal age and BMI, smoking, alcohol, and folic acid use during pregnancy and fertility problems.<sup>c</sup>Exposure to at least one exposure in this group.

OR, odds ratio; EDCs, endocrine-disrupting chemicals; PAHs, polycyclic aromatic hydrocarbons; NC, not calculated due to sparse data (&lt;5 exposed cases).
