# Supplementary material for: Maternal occupational exposure to endocrine-disrupting chemicals and urogenital anomalies in the offspring
Source: PubMed Central journal article supplement — Hum Reprod. 2021 Nov 6;37(1):142–51. doi: 10.1093/humrep/deab205 (PMC8730314; doi:10.1093/humrep/deab205), 2021-11-06
Supplement: deab205_supplementary_table_s3.pdf [file deab205_supplementary_table_s3.pdf]

**Supplementary Table SIII** Prevalence, crude OR and adjusted OR of maternal occupational exposure to EDCs and the risk of urinary anomalies co-occurring with other congenital anomalies in the offspring (Eurocat) compared to non-malformed controls (Lifelines), Northern Netherlands, 1997–2013.

| Occupational exposure                                          | Total<br>n | Unexposed |        | Exposed <sup>a</sup> |        | Unadjusted |              | Adjusted <sup>b</sup> |              |
|----------------------------------------------------------------|------------|-----------|--------|----------------------|--------|------------|--------------|-----------------------|--------------|
|                                                                |            | n         | (%)    | n                    | (%)    | OR         | 95% CI       | OR                    | 95% CI       |
| <b>Any EDC</b>                                                 |            |           |        |                      |        |            |              |                       |              |
| Controls                                                       | 5602       | 4491      | (80.2) | 1111                 | (19.8) | 1.00       |              | 1.00                  |              |
| Urinary anomalies                                              | 117        | 87        | (74.4) | 30                   | (25.6) | 1.39       | (0.92–2.12)  | 1.37                  | (0.87–2.15)  |
| Malformations of the renal parenchyma                          | 45         | 32        | (71.1) | 13                   | (28.9) | 1.64       | (0.86–3.14)  | 1.45                  | (0.72–2.91)  |
| Anomalies of the urinary collecting system                     | 45         | 37        | (82.2) | 8                    | (17.8) | 0.87       | (0.41–1.88)  | 1.02                  | (0.46–2.25)  |
| Abnormal embryonic migration of kidneys                        | 13         | <5        |        |                      |        | NC         |              | NC                    |              |
| Combination of urinary tract anomalies                         | 14         | 9         | (64.3) | 5                    | (35.7) | 2.25       | (0.75–6.71)  | 2.22                  | (0.72–6.84)  |
| <b>PAHs</b>                                                    |            |           |        |                      |        |            |              |                       |              |
| Controls                                                       | 5602       | 5251      | (93.7) | 351                  | (6.3)  | 1.00       |              | 1.00                  |              |
| Urinary total                                                  | 117        | 108       | (92.3) | 9                    | (7.7)  | 1.25       | (0.63–2.48)  | 1.09                  | (0.52–2.28)  |
| Malformations of the renal parenchyma                          | 45         | <5        |        |                      |        | NC         |              | NC                    |              |
| Anomalies of the urinary collecting system                     | 45         | <5        |        |                      |        | NC         |              | NC                    |              |
| Abnormal embryonic migration of kidneys                        | 13         | <5        |        |                      |        | NC         |              | NC                    |              |
| Combination of urinary tract anomalies                         | 14         | <5        |        |                      |        | NC         |              | NC                    |              |
| <b>Pesticides</b>                                              |            |           |        |                      |        |            |              |                       |              |
| Controls                                                       | 5602       | 5486      | (97.9) | 116                  | (2.1)  | 1.00       |              | 1.00                  |              |
| Urinary total                                                  | 117        | <5        |        |                      |        | NC         |              | NC                    |              |
| Malformations of the renal parenchyma                          | 45         | <5        |        |                      |        | NC         |              | NC                    |              |
| Anomalies of the urinary collecting system                     | 45         | <5        |        |                      |        | NC         |              | NC                    |              |
| Abnormal embryonic migration of kidneys                        | 13         | <5        |        |                      |        | NC         |              | NC                    |              |
| Combination of urinary tract anomalies                         | 14         | <5        |        |                      |        | NC         |              | NC                    |              |
| <b>Organic solvents/alkylphenolic compounds<sup>c</sup></b>    |            |           |        |                      |        |            |              |                       |              |
| Controls                                                       | 5602       | 5220      | (93.2) | 104                  | (2.0)  | 1.00       |              | 1.00                  |              |
| Urinary total                                                  | 117        | 104       | (88.9) | 13                   | (11.1) | 1.71       | (0.95–3.07)  | 1.62                  | (0.87–3.03)  |
| Malformations of the renal parenchyma                          | 45         | <5        |        |                      |        | NC         |              | NC                    |              |
| Anomalies of the urinary collecting system                     | 45         | <5        |        |                      |        | NC         |              | NC                    |              |
| Abnormal embryonic migration of kidneys                        | 13         | <5        |        |                      |        | NC         |              | NC                    |              |
| Combination of urinary tract anomalies                         | 14         | 9         | (64.3) | 5                    | (35.7) | 7.59       | (0.53–22.76) | 7.51                  | (2.41–23.43) |
| <b>Phthalates/benzophenones/parabens/siloxanes<sup>c</sup></b> |            |           |        |                      |        |            |              |                       |              |
| Controls                                                       | 5602       | 5348      | (95.5) | 254                  | (4.5)  | 1.00       |              | 1.00                  |              |
| Urinary total                                                  | 117        | 111       | (94.9) | 6                    | (5.1)  | 1.14       | (0.50–2.61)  | 1.20                  | (0.51–2.80)  |
| Malformations of the renal parenchyma                          | 45         | <5        |        |                      |        | NC         |              | NC                    |              |
| Anomalies of the urinary collecting system                     | 45         | <5        |        |                      |        | NC         |              | NC                    |              |
| Abnormal embryonic migration of kidneys                        | 13         | <5        |        |                      |        | NC         |              | NC                    |              |
| Combination of urinary tract anomalies                         | 14         | <5        |        |                      |        | NC         |              | NC                    |              |

<sup>a</sup>Possible or probable exposure.<sup>b</sup>Adjusted for child sex, birth year, maternal age and BMI, smoking, alcohol, and folic acid use during pregnancy and fertility problems.<sup>c</sup>Exposure to at least one exposure in this group.

OR, odds ratio; EDC, endocrine-disrupting chemical; NC, not calculated due to sparse data (&lt;5 exposed cases).
