# Supplementary material for: Maternal occupational exposure to endocrine-disrupting chemicals and urogenital anomalies in the offspring
Source: PubMed Central journal article supplement — Hum Reprod. 2021 Nov 6;37(1):142–51. doi: 10.1093/humrep/deab205 (PMC8730314; doi:10.1093/humrep/deab205), 2021-11-06
Supplement: deab205_supplementary_table_s4.pdf [file deab205_supplementary_table_s4.pdf]

**Supplementary Table SIV** Prevalence, crude OR and adjusted OR of maternal occupational exposure to EDCs and the risk of urinary anomalies in the male offspring (Eurocat) compared to non-malformed controls (Lifelines), Northern Netherlands, 1997–2013.

| Occupational exposure                                          | Total<br>n | Unexposed |        | Exposed <sup>a</sup> |        | Unadjusted |             | Adjusted <sup>b</sup> |             |
|----------------------------------------------------------------|------------|-----------|--------|----------------------|--------|------------|-------------|-----------------------|-------------|
|                                                                |            | n         | (%)    | n                    | (%)    | OR         | 95% CI      | OR                    | 95% CI      |
| <b>Any EDC</b>                                                 |            |           |        |                      |        |            |             |                       |             |
| Controls                                                       | 2731       | 2214      | (81.1) | 517                  | (18.9) | 1.00       |             | 1.00                  |             |
| Urinary anomalies                                              | 377        | 290       | (76.9) | 87                   | (23.1) | 1.29       | (0.99–1.66) | 1.21                  | (0.92–1.61) |
| Malformations of the renal parenchyma                          | 68         | 50        | (73.5) | 18                   | (26.5) | 1.54       | (0.89–2.67) | 1.34                  | (0.75–2.39) |
| Anomalies of the urinary collecting system                     | 256        | 196       | (76.6) | 60                   | (23.4) | 1.31       | (0.97–1.78) | 1.26                  | (0.91–1.76) |
| Abnormal embryonic migration of kidneys                        | 21         | <5        |        |                      |        | NC         |             | NC                    |             |
| Combination of urinary tract anomalies                         | 32         | 27        | (84.4) | 5                    | (15.6) | 0.79       | (0.30–2.07) | 0.70                  | (0.26–1.88) |
| <b>PAHs</b>                                                    |            |           |        |                      |        |            |             |                       |             |
| Controls                                                       | 2731       | 2560      | (93.7) | 171                  | (6.3)  | 1.00       |             | 1.00                  |             |
| Urinary total                                                  | 377        | 345       | (91.5) | 32                   | (8.5)  | 1.39       | (0.94–2.06) | 1.25                  | (0.81–1.91) |
| Malformations of the renal parenchyma                          | 68         | 63        | (92.6) | 5                    | (7.4)  | 1.19       | (0.47–2.99) | 0.85                  | (0.30–2.40) |
| Anomalies of the urinary collecting system                     | 256        | 233       | (91.0) | 23                   | (9.0)  | 1.48       | (0.94–2.33) | 1.40                  | (0.85–2.29) |
| Abnormal embryonic migration of kidneys                        | 21         | <5        |        |                      |        | NC         |             | NC                    |             |
| Combination of urinary tract anomalies                         | 32         | <5        |        |                      |        | NC         |             | NC                    |             |
| <b>Pesticides</b>                                              |            |           |        |                      |        |            |             |                       |             |
| Controls                                                       | 2731       | 2685      | (98.3) | 46                   | (1.7)  | 1.00       |             | 1.00                  |             |
| Urinary total                                                  | 377        | 371       | (98.4) | 6                    | (1.6)  | 0.94       | (0.40–2.23) | 0.92                  | (0.37–2.30) |
| Malformations of the renal parenchyma                          | 68         | <5        |        |                      |        | NC         |             | NC                    |             |
| Anomalies of the urinary collecting system                     | 256        | 251       | (98.0) | 5                    | (2.0)  | 1.16       | (0.46–2.95) | 1.11                  | (0.41–3.01) |
| Abnormal embryonic migration of kidneys                        | 21         | <5        |        |                      |        | NC         |             | NC                    |             |
| Combination of urinary tract anomalies                         | 32         | <5        |        |                      |        | NC         |             | NC                    |             |
| <b>Organic solvents/alkylphenolic compounds<sup>c</sup></b>    |            |           |        |                      |        |            |             |                       |             |
| Controls                                                       | 2731       | 2558      | (93.7) | 173                  | (6.3)  | 1.00       |             | 1.00                  |             |
| Urinary total                                                  | 377        | 346       | (91.8) | 31                   | (8.2)  | 1.33       | (0.89–1.97) | 1.20                  | (0.77–1.85) |
| Malformations of the renal parenchyma                          | 68         | 63        | (92.6) | 5                    | (7.4)  | 2.15       | (0.77–6.07) | 0.99                  | (0.38–2.56) |
| Anomalies of the urinary collecting system                     | 256        | 233       | (91.0) | 23                   | (9.0)  | 1.46       | (0.93–2.30) | 1.32                  | (0.80–2.16) |
| Abnormal embryonic migration of kidneys                        | 21         | <5        |        |                      |        | NC         |             | NC                    |             |
| Combination of urinary tract anomalies                         | 32         | <5        |        |                      |        | NC         |             | NC                    |             |
| <b>Phthalates/benzophenones/parabens/siloxanes<sup>c</sup></b> |            |           |        |                      |        |            |             |                       |             |
| Controls                                                       | 2731       | 2620      | (95.9) | 111                  | (4.1)  | 1.00       |             | 1.00                  |             |
| Urinary total                                                  | 377        | 351       | (93.1) | 26                   | (6.9)  | 1.75       | (1.13–2.72) | 1.68                  | (1.04–2.73) |
| Malformations of the renal parenchyma                          | 68         | <5        |        |                      |        | NC         |             | NC                    |             |
| Anomalies of the urinary collecting system                     | 256        | 237       | (92.6) | 19                   | (7.4)  | 1.89       | (1.14–3.13) | 1.85                  | (1.06–3.23) |
| Abnormal embryonic migration of kidneys                        | 21         | <5        |        |                      |        | NC         |             | NC                    |             |
| Combination of urinary tract anomalies                         | 32         | <5        |        |                      |        | NC         |             | NC                    |             |

<sup>a</sup>Possible or probable exposure.<sup>b</sup>Adjusted for child sex, birth year, maternal age and BMI, smoking, alcohol, and folic acid use during pregnancy and fertility problems.<sup>c</sup>Exposure to at least one exposure in this group.

OR, odds ratio; EDC, endocrine-disrupting chemical; NC, not calculated due to sparse data (&lt;5 exposed cases); PAHs, polycyclic aromatic hydrocarbons.
