# Supplementary material for: Maternal occupational exposure to endocrine-disrupting chemicals and urogenital anomalies in the offspring
Source: PubMed Central journal article supplement — Hum Reprod. 2021 Nov 6;37(1):142–51. doi: 10.1093/humrep/deab205 (PMC8730314; doi:10.1093/humrep/deab205), 2021-11-06
Supplement: deab205_supplementary_table_s5.pdf [file deab205_supplementary_table_s5.pdf]

**Supplementary Table SV** Prevalence, crude OR and adjusted OR of maternal occupational exposure to EDCs and the risk of urinary anomalies in the female offspring (Eurocat) compared to non-malformed controls (Lifelines), Northern Netherlands, 1997–2013.

| Occupational exposure                                          | Total<br>n | Unexposed |        | Exposed <sup>a</sup> |        | Unadjusted |             | Adjusted <sup>b</sup> |             |
|----------------------------------------------------------------|------------|-----------|--------|----------------------|--------|------------|-------------|-----------------------|-------------|
|                                                                |            | n         | (%)    | n                    | (%)    | OR         | 95% CI      | OR                    | 95% CI      |
| <b>Any EDC</b>                                                 |            |           |        |                      |        |            |             |                       |             |
| Controls                                                       | 2871       | 2277      | (79.3) | 598                  | (20.7) | 1.00       |             | 1.00                  |             |
| Urinary anomalies                                              | 160        | 123       | (76.9) | 37                   | (23.1) | 1.15       | (0.79–1.68) | 1.19                  | (0.79–1.77) |
| Malformations of the renal parenchyma                          | 41         | 35        | (85.4) | 6                    | (14.6) | 0.66       | (0.28–1.57) | 0.62                  | (0.25–1.54) |
| Anomalies of the urinary collecting system                     | 104        | 78        | (75.0) | 26                   | (25.0) | 1.28       | (0.81–2.01) | 1.31                  | (0.82–2.11) |
| Abnormal embryonic migration of kidneys                        | 4          | <5        |        |                      |        | NC         |             | NC                    |             |
| Combination of urinary tract anomalies                         | 11         | <5        |        |                      |        | NC         |             | NC                    |             |
| <b>PAHs</b>                                                    |            |           |        |                      |        |            |             |                       |             |
| Controls                                                       | 2871       | 2691      | (93.7) | 180                  | (6.3)  | 1.00       |             | 1.00                  |             |
| Urinary total                                                  | 160        | 153       | (95.6) | 7                    | (4.4)  | 0.68       | (0.32–1.48) | 0.66                  | (0.30–1.45) |
| Malformations of the renal parenchyma                          | 41         | <5        |        |                      |        | NC         |             | NC                    |             |
| Anomalies of the urinary collecting system                     | 104        | 97        | (93.3) | 7                    | (6.7)  | 1.08       | (0.49–2.36) | 1.03                  | (0.46–2.29) |
| Abnormal embryonic migration of kidneys                        | 25         | <5        |        |                      |        | NC         |             | NC                    |             |
| Combination of urinary tract anomalies                         | 11         | <5        |        |                      |        | NC         |             | NC                    |             |
| <b>Pesticides</b>                                              |            |           |        |                      |        |            |             |                       |             |
| Controls                                                       | 2871       | 2801      | (97.6) | 0                    | (0)    | 1.00       |             | 1.00                  |             |
| Urinary total                                                  | 160        | <5        |        |                      |        | NC         |             | NC                    |             |
| Malformations of the renal parenchyma                          | 41         | <5        |        |                      |        | NC         |             | NC                    |             |
| Anomalies of the urinary collecting system                     | 104        | <5        |        |                      |        | NC         |             | NC                    |             |
| Abnormal embryonic migration of kidneys                        | 4          | <5        |        |                      |        | NC         |             | NC                    |             |
| Combination of urinary tract anomalies                         | 11         | <5        |        |                      |        | NC         |             | NC                    |             |
| <b>Organic solvents/alkylphenolic compounds<sup>c</sup></b>    |            |           |        |                      |        |            |             |                       |             |
| Controls                                                       | 2871       | 2662      | (92.7) | 209                  | (7.3)  | 1.00       |             | 1.00                  |             |
| Urinary total                                                  | 160        | 140       | (87.5) | 20                   | (8.7)  | 1.82       | (1.16–2.97) | 1.87                  | (1.11–3.14) |
| Malformations of the renal parenchyma                          | 41         | <5        |        |                      |        | NC         |             | NC                    |             |
| Anomalies of the urinary collecting system                     | 104        | 93        | (89.4) | 11                   | (10.6) | 1.51       | (0.79–2.89) | 1.56                  | (0.81–3.03) |
| Abnormal embryonic migration of kidneys                        | 4          | <5        |        |                      |        | NC         |             | NC                    |             |
| Combination of urinary tract anomalies                         | 11         | <5        |        |                      |        | NC         |             | NC                    |             |
| <b>Phthalates/benzophenones/parabens/siloxanes<sup>c</sup></b> |            |           |        |                      |        |            |             |                       |             |
| Controls                                                       | 2871       | 2728      | (95.0) | 143                  | (5.0)  | 1.00       |             | 1.00                  |             |
| Urinary total                                                  | 160        | 149       | (93.1) | 11                   | (6.9)  | 1.41       | (0.75–2.66) | 1.41                  | (0.73–2.73) |
| Malformations of the renal parenchyma                          | 41         | <5        |        |                      |        | NC         |             | NC                    |             |
| Anomalies of the urinary collecting system                     | 104        | 97        | (93.3) | 7                    | (6.7)  | 1.38       | (0.63–3.02) | 1.34                  | (0.60–2.99) |
| Abnormal embryonic migration of kidneys                        | 4          | <5        |        |                      |        | NC         |             | NC                    |             |
| Combination of urinary tract anomalies                         | 11         | <5        |        |                      |        | NC         |             | NC                    |             |

<sup>a</sup>Possible or probable exposure.<sup>b</sup>Adjusted for child sex, birth year, maternal age and BMI, smoking, alcohol, and folic acid use during pregnancy and fertility problems.<sup>c</sup>Exposure to at least one exposure in this group.

OR, odds ratio; NC, not calculated due to sparse data (&lt;5 exposed cases); EDC, endocrine-disrupting chemical; PAHs, polycyclic aromatic hydrocarbons.
