# Supplementary material for: Maternal occupational exposure to endocrine-disrupting chemicals and urogenital anomalies in the offspring
Source: PubMed Central journal article supplement — Hum Reprod. 2021 Nov 6;37(1):142–51. doi: 10.1093/humrep/deab205 (PMC8730314; doi:10.1093/humrep/deab205), 2021-11-06
Supplement: deab205_supplementary_table_s6.pdf [file deab205_supplementary_table_s6.pdf]

**Supplementary Table SVI** Prevalence, crude OR and adjusted OR of probable maternal occupational exposure to EDCs and the risk of urinary anomalies in the offspring (Eurocat) compared to non-malformed controls (Lifelines), Northern Netherlands, 1997–2013.

| Occupational exposure                                          | Total<br>n | Unexposed |        | Exposed <sup>a</sup> |       | Unadjusted |             | Adjusted <sup>b</sup> |             |  |
|----------------------------------------------------------------|------------|-----------|--------|----------------------|-------|------------|-------------|-----------------------|-------------|--|
|                                                                |            | n         | (%)    | n                    | (%)   | OR         | 95% CI      | OR                    | 95% CI      |  |
| <b>Any EDC</b>                                                 |            |           |        |                      |       |            |             |                       |             |  |
| Controls                                                       | 4822       | 4491      | (93.1) | 331                  | (6.9) | 1.00       |             | 1.00                  |             |  |
| Urinary anomalies                                              | 448        | 413       | (92.2) | 35                   | (7.8) | 1.15       | (0.80–1.65) | 0.97                  | (0.65–1.45) |  |
| Malformations of the renal parenchyma                          | 90         | 85        | (94.4) | 5                    | (5.6) | 0.80       | (0.32–1.98) | 0.49                  | (0.17–1.37) |  |
| Anomalies of the urinary collecting system                     | 301        | 274       | (91.0) | 27                   | (9.0) | 1.34       | (0.89–2.02) | 1.20                  | (0.77–1.87) |  |
| Abnormal embryonic migration of kidneys                        | 21         | <5        |        |                      |       | NC         |             | NC                    |             |  |
| Combination of urinary tract anomalies                         | 36         | <5        |        |                      |       | NC         |             | NC                    |             |  |
| <b>PAHs</b>                                                    |            |           |        |                      |       |            |             |                       |             |  |
| Controls                                                       | 5372       | 5251      | (97.7) | 121                  | (2.3) | 1.00       |             | 1.00                  |             |  |
| Urinary total                                                  | 512        | 498       | (97.3) | 14                   | (2.7) | 1.22       | (0.70–2.14) | 0.88                  | (0.47–1.64) |  |
| Malformations of the renal parenchyma                          | 106        | <5        |        |                      |       | NC         |             | NC                    |             |  |
| Anomalies of the urinary collecting system                     | 340        | 330       | (97.1) | 10                   | (2.9) | 1.32       | (0.68–2.53) | 1.08                  | (0.53–2.19) |  |
| Abnormal embryonic migration of kidneys                        | 23         | <5        |        |                      |       | NC         |             | NC                    |             |  |
| Combination of urinary tract anomalies                         | 43         | <5        |        |                      |       | NC         |             | NC                    |             |  |
| <b>Pesticides</b>                                              |            |           |        |                      |       |            |             |                       |             |  |
| Controls                                                       | 5486       | 98.7      | (72.0) | 1.3                  | (0.2) | 1.00       |             | 1.00                  |             |  |
| Urinary total                                                  | 534        | <5        |        |                      |       | NC         |             | NC                    |             |  |
| Malformations of the renal parenchyma                          | 496        | <5        |        |                      |       | NC         |             | NC                    |             |  |
| Anomalies of the urinary collecting system                     | 358        | <5        |        |                      |       | NC         |             | NC                    |             |  |
| Abnormal embryonic migration of kidneys                        | 25         | <5        |        |                      |       | NC         |             | NC                    |             |  |
| Combination of urinary tract anomalies                         | 43         | <5        |        |                      |       | NC         |             | NC                    |             |  |
| <b>Organic solvents/alkylphenolic compounds<sup>c</sup></b>    |            |           |        |                      |       |            |             |                       |             |  |
| Controls                                                       | 5228       | 5220      | (99.8) | 8                    | (0.2) | 1.00       |             | 1.00                  |             |  |
| Urinary total                                                  | 487        | <5        |        |                      |       | NC         |             | NC                    |             |  |
| Malformations of the renal parenchyma                          | 100        | <5        |        |                      |       | NC         |             | NC                    |             |  |
| Anomalies of the urinary collecting system                     | 327        | <5        |        |                      |       | NC         |             | NC                    |             |  |
| Abnormal embryonic migration of kidneys                        | 23         | <5        |        |                      |       | NC         |             | NC                    |             |  |
| Combination of urinary tract anomalies                         | 37         | <5        |        |                      |       | NC         |             | NC                    |             |  |
| <b>Phthalates/benzophenones/parabens/siloxanes<sup>c</sup></b> |            |           |        |                      |       |            |             |                       |             |  |
| Controls                                                       | 5522       | 5348      | (96.8) | 174                  | (3.2) | 1.00       |             | 1.00                  |             |  |
| Urinary total                                                  | 531        | 500       | (94.2) | 31                   | (5.8) | 1.91       | (1.29–2.82) | 1.91                  | (1.24–2.93) |  |
| Malformations of the renal parenchyma                          | 106        | <5        |        |                      |       | NC         |             | NC                    |             |  |
| Anomalies of the urinary collecting system                     | 355        | 334       | (94.1) | 21                   | (5.9) | 1.93       | (1.21–3.08) | 1.90                  | (1.14–3.15) |  |
| Abnormal embryonic migration of kidneys                        | 24         | <5        |        |                      |       | NC         |             | NC                    |             |  |
| Combination of urinary tract anomalies                         | 39         | <5        |        |                      |       | NC         |             | NC                    |             |  |

<sup>a</sup>Probable exposure.<sup>b</sup>Adjusted for child sex, birth year, maternal age and BMI, smoking, alcohol, and folic acid use during pregnancy and fertility problems.<sup>c</sup>Exposure to at least one exposure in this group.

OR, odds ratio; NC, not calculated due to sparse data (&lt;5 exposed cases); EDC, endocrine-disrupting chemical; PAHs, polycyclic aromatic hydrocarbons.
