# Supplementary material for: Maternal occupational exposure to endocrine-disrupting chemicals and urogenital anomalies in the offspring
Source: PubMed Central journal article supplement — Hum Reprod. 2021 Nov 6;37(1):142–51. doi: 10.1093/humrep/deab205 (PMC8730314; doi:10.1093/humrep/deab205), 2021-11-06
Supplement: deab205_supplementary_table_s7.pdf [file deab205_supplementary_table_s7.pdf]

**Supplementary Table SVII** Prevalence, crude OR and adjusted OR of maternal occupational exposure to EDCs and the risk of urinary anomalies in the offspring (Eurocat) compared to non-malformed controls and non-exposed as reference category (Lifelines), Northern Netherlands, 1997–2013.

| Occupational exposure                                          | Total | Unexposed |        | Exposed <sup>a</sup> |        | Unadjusted |             | Adjusted <sup>b</sup> |             |  |
|----------------------------------------------------------------|-------|-----------|--------|----------------------|--------|------------|-------------|-----------------------|-------------|--|
|                                                                | n     | n         | (%)    | n                    | (%)    | OR         | 95% CI      | OR                    | 95% CI      |  |
| <b>Any EDC</b>                                                 |       |           |        |                      |        |            |             |                       |             |  |
| Controls                                                       | 5602  | 4491      | (80.2) | 1111                 | (19.8) | 1.00       |             | 1.00                  |             |  |
| Urinary anomalies                                              | 537   | 413       | (76.9) | 124                  | (23.1) | 1.21       | (0.98–1.50) | 1.21                  | (0.96–1.53) |  |
| Malformations of the renal parenchyma                          | 109   | 85        | (78.0) | 24                   | (22.0) | 1.14       | (0.72–1.80) | 1.04                  | (0.64–1.69) |  |
| Anomalies of the urinary collecting system                     | 360   | 274       | (76.1) | 86                   | (23.9) | 1.27       | (0.99–1.63) | 1.29                  | (0.98–1.69) |  |
| Abnormal embryonic migration of kidneys                        | 25    | 20        | (80.0) | 5                    | (20.0) | 1.01       | (0.38–2.67) | 0.84                  | (0.28–2.52) |  |
| Combination of urinary tract anomalies                         | 43    | 34        | (79.1) | 9                    | (20.9) | 1.07       | (0.51–2.24) | 1.10                  | (0.51–2.35) |  |
| <b>PAHs</b>                                                    |       |           |        |                      |        |            |             |                       |             |  |
| Controls                                                       | 4842  | 4491      | (92.8) | 351                  | (7.2)  | 1.00       |             | 1.00                  |             |  |
| Urinary total                                                  | 452   | 413       | (91.4) | 39                   | (8.6)  | 1.21       | (0.86–1.71) | 1.09                  | (0.75–1.58) |  |
| Malformations of the renal parenchyma                          | 90    | 85        | (94.4) | 5                    | (5.6)  | 0.75       | (0.30–1.87) | 0.50                  | (0.18–1.41) |  |
| Anomalies of the urinary collecting system                     | 304   | 274       | (90.1) | 30                   | (9.9)  | 1.40       | (0.95–2.07) | 1.12                  | (0.87–2.00) |  |
| Abnormal embryonic migration of kidneys                        | 23    | <5        |        |                      |        | NC         |             | NC                    |             |  |
| Combination of urinary tract anomalies                         | 35    | <5        |        |                      |        | NC         |             | NC                    |             |  |
| <b>Pesticides</b>                                              |       |           |        |                      |        |            |             |                       |             |  |
| Controls                                                       | 4607  | 4491      | (97.5) | 116                  | (2.5)  | 1.00       |             | 1.00                  |             |  |
| Urinary total                                                  | 419   | 416       | (98.6) | 6                    | (1.4)  | 0.56       | (0.25–1.29) | 0.55                  | (0.23–1.31) |  |
| Malformations of the renal parenchyma                          | 86    | 85        | (98.8) | 1                    | (1.2)  | NC         |             | NC                    |             |  |
| Anomalies of the urinary collecting system                     | 279   | 274       | (98.2) | 5                    | (1.8)  | 0.71       | (0.29–1.74) | 0.68                  | (0.26–1.76) |  |
| Abnormal embryonic migration of kidneys                        | 20    | <5        |        |                      |        | NC         |             | NC                    |             |  |
| Combination of urinary tract anomalies                         | 34    | <5        |        |                      |        | NC         |             | NC                    |             |  |
| <b>Organic solvents/alkylphenolic compounds<sup>c</sup></b>    |       |           |        |                      |        |            |             |                       |             |  |
| Controls                                                       | 4873  | 4491      | (92.2) | 382                  | (7.8)  | 1.00       |             | 1.00                  |             |  |
| Urinary total                                                  | 464   | 413       | (89.0) | 51                   | (11.0) | 1.45       | (1.07–1.98) | 1.41                  | (1.00–1.98) |  |
| Malformations of the renal parenchyma                          | 94    | 85        | (90.4) | 9                    | (9.6)  | 1.25       | (0.62–2.49) | 1.14                  | (0.56–2.35) |  |
| Anomalies of the urinary collecting system                     | 308   | 274       | (89.0) | 34                   | (11.0) | 1.46       | (1.01–2.12) | 1.41                  | (0.95–2.11) |  |
| Abnormal embryonic migration of kidneys                        | 22    | <5        |        |                      |        | NC         |             | NC                    |             |  |
| Combination of urinary tract anomalies                         | 40    | 34        | (85.0) | 6                    | (15.0) | 2.08       | (0.87–4.97) | 1.934                 | (0.78–4.80) |  |
| <b>Phthalates/benzophenones/parabens/siloxanes<sup>c</sup></b> |       |           |        |                      |        |            |             |                       |             |  |
| Controls                                                       | 4745  | 4491      | (94.6) | 254                  | (5.4)  | 1.00       |             | 1.00                  |             |  |
| Urinary total                                                  | 450   | 413       | (91.8) | 37                   | (8.2)  | 1.58       | (1.11–2.27) | 1.55                  | (1.04–2.29) |  |
| Malformations of the renal parenchyma                          | 90    | 85        | (94.4) | 5                    | (5.6)  | 1.04       | (0.42–2.59) | 0.89                  | (0.35–2.29) |  |
| Anomalies of the urinary collecting system                     | 300   | 274       | (91.3) | 26                   | (8.7)  | 1.68       | (1.10–2.56) | 1.64                  | (1.04–2.60) |  |
| Abnormal embryonic migration of kidneys                        | 21    | <5        |        |                      |        | NC         |             | NC                    |             |  |
| Combination of urinary tract anomalies                         | 39    | 34        | (87.2) | 5                    | (12.8) | 2.60       | (1.01–6.71) | 2.55                  | (0.94–6.88) |  |

<sup>a</sup>Possible or probable exposure.<sup>b</sup>Adjusted for child sex, birth year, maternal age and BMI, smoking, alcohol, and folic acid use during pregnancy and fertility problems.<sup>c</sup>Exposure to at least one exposure in this group.

OR, odds ratio; NC, not calculated due to sparse data (&lt;5 exposed cases); EDC, endocrine-disrupting chemical; PAHs, polycyclic aromatic hydrocarbons.
