# Supplementary material for: Maternal occupational exposure to endocrine-disrupting chemicals and urogenital anomalies in the offspring
Source: PubMed Central journal article supplement — Hum Reprod. 2021 Nov 6;37(1):142–51. doi: 10.1093/humrep/deab205 (PMC8730314; doi:10.1093/humrep/deab205), 2021-11-06
Supplement: deab205_supplementary_table_s8.pdf [file deab205_supplementary_table_s8.pdf]

**Supplementary Table SVIII** Prevalence, crude OR, and adjusted OR of maternal occupational exposure to EDCs and the risk of isolated hypospadias and hypospadias co-occurring with other congenital anomalies in the offspring (Eurocat) compared to non-malformed controls and non-exposed as reference category (Lifelines), Northern Netherlands, 1997–2013.

| Occupational exposure                                          | Total | Unexposed |        | Exposed <sup>a</sup> |        | Unadjusted |             | Adjusted <sup>b</sup> |             |
|----------------------------------------------------------------|-------|-----------|--------|----------------------|--------|------------|-------------|-----------------------|-------------|
|                                                                | n     | n         | (%)    | n                    | (%)    | OR         | 95% CI      | OR                    | 95% CI      |
| <b>Any EDC</b>                                                 |       |           |        |                      |        |            |             |                       |             |
| Controls <sup>c</sup>                                          | 2731  | 2214      | (81.1) | 517                  | (18.9) | 1.00       |             | 1.00                  |             |
| Hypospadias isolated                                           | 341   | 264       | (77.4) | 77                   | (22.6) | 1.25       | (0.95–1.64) | 1.23                  | (0.92–1.64) |
| Hypospadias co-occurring with other CAs                        | 30    | 22        | (73.3) | 8                    | (26.7) | 1.56       | (0.69–3.52) | 1.46                  | (0.63–3.39) |
| <b>PAHs</b>                                                    |       |           |        |                      |        |            |             |                       |             |
| Controls <sup>c</sup>                                          | 2731  | 2560      | (93.7) | 171                  | (6.3)  | 1.00       |             | 1.00                  |             |
| Hypospadias isolated                                           | 341   | 313       | (91.8) | 28                   | (8.2)  | 1.34       | (0.88–2.03) | 1.35                  | (0.88–2.08) |
| Hypospadias co-occurring with other CAs                        | 30    | <5        |        |                      |        | NC         |             |                       |             |
| <b>Pesticides</b>                                              |       |           |        |                      |        |            |             |                       |             |
| Controls <sup>c</sup>                                          | 2731  | 2685      | (98.3) | 46                   | (1.7)  | 1.00       |             | 1.00                  |             |
| Hypospadias isolated                                           | 341   | 336       | (98.5) | 5                    | (1.5)  | 0.87       | (0.34–2.20) | 0.84                  | (0.32–2.17) |
| Hypospadias co-occurring with other CAs                        | 30    | <5        |        |                      |        | NC         |             |                       |             |
| <b>Organic solvents/alkylphenolic compounds<sup>d</sup></b>    |       |           |        |                      |        |            |             |                       |             |
| Controls <sup>c</sup>                                          | 2731  | 2560      | (93.7) | 171                  | (6.3)  | 1.00       |             | 1.00                  |             |
| Hypospadias isolated                                           | 341   | 320       | (93.8) | 21                   | (6.2)  | 0.97       | (0.61–1.55) | 0.88                  | (0.54–1.43) |
| Hypospadias co-occurring with other CAs                        | 30    | <5        |        |                      |        | NC         |             |                       |             |
| <b>Phthalates/benzophenones/parabens/siloxanes<sup>d</sup></b> |       |           |        |                      |        |            |             |                       |             |
| Controls <sup>c</sup>                                          | 2731  | 2620      | (95.9) | 111                  | (4.1)  | 1.00       |             | 1.00                  |             |
| Hypospadias isolated                                           | 341   | 351       | (94.6) | 20                   | (5.4)  | 1.35       | (0.83–2.19) | 1.21                  | (0.73–2.01) |
| Hypospadias co-occurring with other CAs                        | 3     | <5        |        |                      |        | NC         |             |                       |             |

<sup>a</sup>Possible or probable exposure.<sup>b</sup>Adjusted for birth year, maternal age and BMI, smoking and alcohol use during pregnancy.<sup>c</sup>Only boys are selected as controls.<sup>d</sup>Exposure to at least one exposure in this group.

OR, odds ratio; NC, not calculated due to sparse data (&lt;5 exposed cases); CAs, congenital anomalies; EDC, endocrine-disrupting chemical; PAHs, polycyclic aromatic hydrocarbons.
