# Supplementary material for: Maternal occupational exposure to endocrine-disrupting chemicals and urogenital anomalies in the offspring
Source: PubMed Central journal article supplement — Hum Reprod. 2021 Nov 6;37(1):142–51. doi: 10.1093/humrep/deab205 (PMC8730314; doi:10.1093/humrep/deab205), 2021-11-06
Supplement: deab205_supplementary_table_s9.pdf [file deab205_supplementary_table_s9.pdf]

**Supplementary Table SIX** Prevalence, crude OR and adjusted OR of probable maternal occupational exposed to EDCs and the risk of hypospadias in the offspring (Eurocat) compared to non-malformed controls (Lifelines), Northern Netherlands, 1997–2013.

| Occupational exposure                                    | Total | Unexposed |        | Exposed <sup>a</sup> |       | Unadjusted |             | Adjusted <sup>b</sup> |             |  |
|----------------------------------------------------------|-------|-----------|--------|----------------------|-------|------------|-------------|-----------------------|-------------|--|
|                                                          | n     | n         | (%)    | n                    | (%)   | OR         | 95% CI      | OR                    | 95% CI      |  |
| Any EDC                                                  |       |           |        |                      |       |            |             |                       |             |  |
| Controls <sup>c</sup>                                    | 2369  | 2214      | (93.5) | 155                  | (6.5) | 1.00       |             | 1.00                  |             |  |
| Hypospadias                                              | 310   | 286       | (92.3) | 24                   | (7.7) | 1.20       | (0.77–1.88) | 1.10                  | (0.69–1.77) |  |
| PAHs                                                     |       |           |        |                      |       |            |             |                       |             |  |
| Controls <sup>c</sup>                                    | 2620  | 2560      | (97.7) | 60                   | (2.3) | 1.00       |             | 1.00                  |             |  |
| Hypospadias                                              | 354   | 340       | (96.0) | 14                   | (4.0) | 1.76       | (0.97–3.18) | 1.57                  | (0.84–2.95) |  |
| Pesticides                                               |       |           |        |                      |       |            |             |                       |             |  |
| Controls <sup>c</sup>                                    | 2716  | 2685      | (98.9) | 31                   | (1.1) | 1.00       |             | 1.00                  |             |  |
| Hypospadias                                              | 369   | <5        |        |                      |       | NC         |             | NC                    |             |  |
| Organic solvents/alkylphenolic compounds <sup>d</sup>    |       |           |        |                      |       |            |             |                       |             |  |
| Controls <sup>c</sup>                                    | 2561  | 2558      | (99.9) | 3                    | (0.1) | 1.00       |             | 1.00                  |             |  |
| Hypospadias                                              | 320   | <5        |        |                      |       | NC         |             | NC                    |             |  |
| Phthalates/benzophenones/parabens/siloxanes <sup>d</sup> |       |           |        |                      |       |            |             |                       |             |  |
| Controls <sup>c</sup>                                    | 2697  | 2620      | (97.1) | 77                   | (2.9) | 1.00       |             | 1.00                  |             |  |
| Hypospadias                                              | 338   | 322       | (95.3) | 16                   | (4.7) | 1.69       | (0.98–2.93) | 1.22                  | (0.91–1.63) |  |

<sup>a</sup>Probable exposure.<sup>b</sup>Adjusted for birth year, maternal age and BMI, smoking and alcohol use during pregnancy.<sup>c</sup>Only boys are selected as controls.<sup>d</sup>Exposure to at least one exposure in this group.

OR, odds ratio; NC, not calculated due to sparse data (&lt;5 exposed cases); CAs, congenital anomalies; PAHs, polycyclic aromatic hydrocarbons.
