# Supplementary material for: Maternal occupational exposure to endocrine-disrupting chemicals and urogenital anomalies in the offspring
Source: PubMed Central journal article supplement — Hum Reprod. 2021 Nov 6;37(1):142–51. doi: 10.1093/humrep/deab205 (PMC8730314; doi:10.1093/humrep/deab205), 2021-11-06
Supplement: deab205_supplementary_table_s10.pdf [file deab205_supplementary_table_s10.pdf]

**Supplementary Table SX** Prevalence, crude OR and adjusted OR of maternal occupational exposure to EDCs and the risk of hypospadias in the offspring (Eurocat) compared to non-malformed controls (males only) and non-exposed as reference category (Lifelines), Northern Netherlands, 1997–2013.

| Occupational exposure                                    | Total | Unexposed |        | Exposed <sup>a</sup> |       | Unadjusted |             | Adjusted <sup>a</sup> |             |  |
|----------------------------------------------------------|-------|-----------|--------|----------------------|-------|------------|-------------|-----------------------|-------------|--|
|                                                          | n     | n         | (%)    | n                    | (%)   | OR         | 95% CI      | OR                    | 95% CI      |  |
| Any EDC                                                  |       |           |        |                      |       |            |             |                       |             |  |
| Controls <sup>c</sup>                                    | 2369  | 2214      | (93.5) | 155                  | (6.5) | 1.00       |             | 1.00                  |             |  |
| Hypospadias                                              | 310   | 286       | (92.3) | 24                   | (7.7) | 1.20       | (0.77–1.88) | 1.10                  | (0.69–1.77) |  |
| PAHs                                                     |       |           |        |                      |       |            |             |                       |             |  |
| Controls <sup>c</sup>                                    | 2385  | 2214      | (92.8) | 171                  | (7.2) | 1.00       |             | 1.00                  |             |  |
| Hypospadias                                              | 317   | 286       | (90.2) | 31                   | (9.8) | 1.40       | (0.94–2.10) | 1.42                  | (0.93–2.16) |  |
| Pesticides                                               |       |           |        |                      |       |            |             |                       |             |  |
| Controls <sup>c</sup>                                    | 2260  | 2214      | (98.0) | 46                   | (2.0) | 1.00       |             | 1.00                  |             |  |
| Hypospadias                                              | 291   | 286       | (98.3) | 5                    | (1.7) | 0.84       | (0.33–2.14) | 0.81                  | (0.31–2.10) |  |
| Organic solvents/alkylphenolic compounds <sup>d</sup>    |       |           |        |                      |       |            |             |                       |             |  |
| Controls <sup>c</sup>                                    | 2387  | 2214      | (92.8) | 173                  | (7.2) | 1.00       |             | 1.00                  |             |  |
| Hypospadias                                              | 310   | 286       | (92.3) | 24                   | (7.7) | 1.07       | (0.69–1.68) | 0.99                  | (0.62–1.57) |  |
| Phthalates/benzophenones/parabens/siloxanes <sup>d</sup> |       |           |        |                      |       |            |             |                       |             |  |
| Controls <sup>c</sup>                                    | 2325  | 2214      | (95.2) | 111                  | (4.8) | 1.00       |             | 1.00                  |             |  |
| Hypospadias                                              | 306   | 286       | (93.5) | 20                   | (6.5) | 1.40       | (0.85–2.28) | 1.26                  | (0.75–2.11) |  |

<sup>a</sup>Possible or probable exposure.<sup>b</sup>Adjusted for birth year, maternal age and BMI, smoking and alcohol use during pregnancy.<sup>c</sup>Only boys are selected as controls.<sup>d</sup>Exposure to at least one exposure in this group.

OR, odds ratio; NC, not calculated due to sparse data (&lt;5 exposed cases); CAs, congenital anomalies; EDC, endocrine-disrupting chemical; PAHs, polycyclic aromatic hydrocarbons.
